# Supplementary material for: Distinctions between the Koizumi and Zea Longa methods for middle cerebral artery occlusion (MCAO) model: a systematic review and meta-analysis of rodent data
Source: PubMed Central journal article supplement (PMC10290095; doi:10.1038/s41598-023-37187-w), 2023-06-23
Supplement: 41598_2023_37187_MOESM1_ESM.pdf [file 41598_2023_37187_MOESM1_ESM.pdf]

## **Supplementary material**

**Article title:** Distinctions between the Koizumi and Longa methods for middle cerebral artery occlusion (MCAO) model: A systematic review and meta-analysis of rodent data

**Journal name:** Scientific Reports

**Author names:** Yong Li<sup>1</sup>, Li Tan<sup>1</sup>, Caixia Yang<sup>1</sup>, Liying He<sup>1</sup>, Lin Liu<sup>1</sup>, Bowen Deng<sup>1</sup>, Sijing Liu, Jinlin Guo<sup>1</sup>

**Affiliation and e-mail address of the corresponding author:**

Jinlin Guo (guo596@cdutcm.edu.cn),

College of Pharmacy, Chengdu University of Traditional Chinese Medicine, Chengdu, China

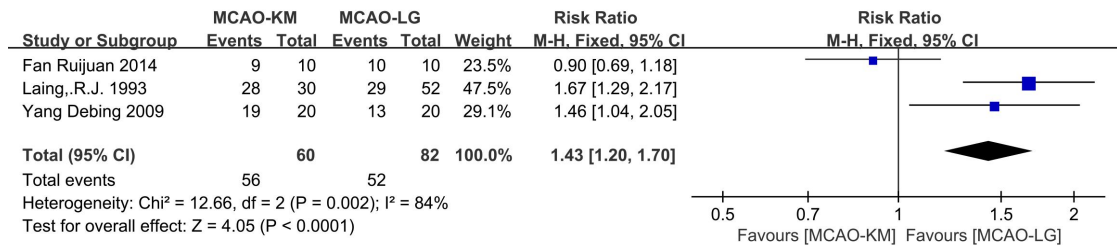

**Figure 1.** Forest plot of the filament insertion success rate before sensitivity analysis between the MCAO-KM and the MCAO-LG.

**(a)** Egger's publication bias plot

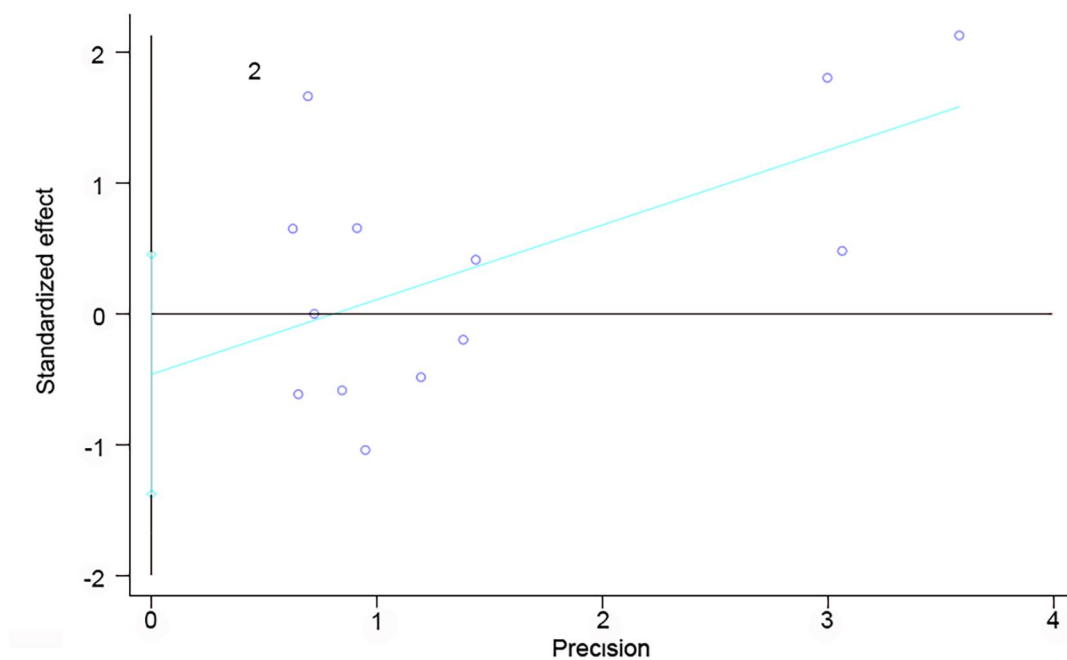

**(b)** Egger's test

| Std_Eff | Coef.     | Std. Err. | t     | P> t  | [95% Conf. Interval] |          |
|---------|-----------|-----------|-------|-------|----------------------|----------|
| slope   | .5709336  | .2349298  | 2.43  | 0.033 | .0538567             | 1.088011 |
| bias    | -.4621282 | .4166149  | -1.11 | 0.291 | -1.379091            | .4548351 |

**Figure 2.** Postoperative mortality of MCAO model between the MCAO-KM and the MCAO-LG. (a) Egger's publication bias plot, and (b) Egger's test results.

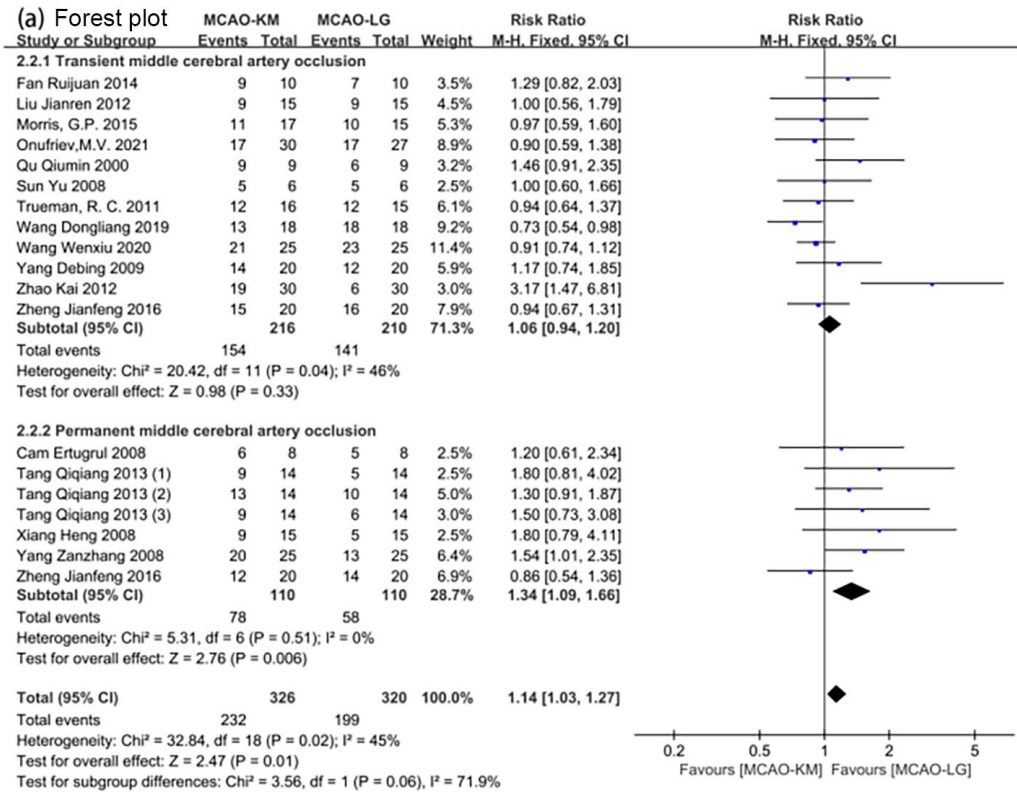

(b) Egger's publication bias plot

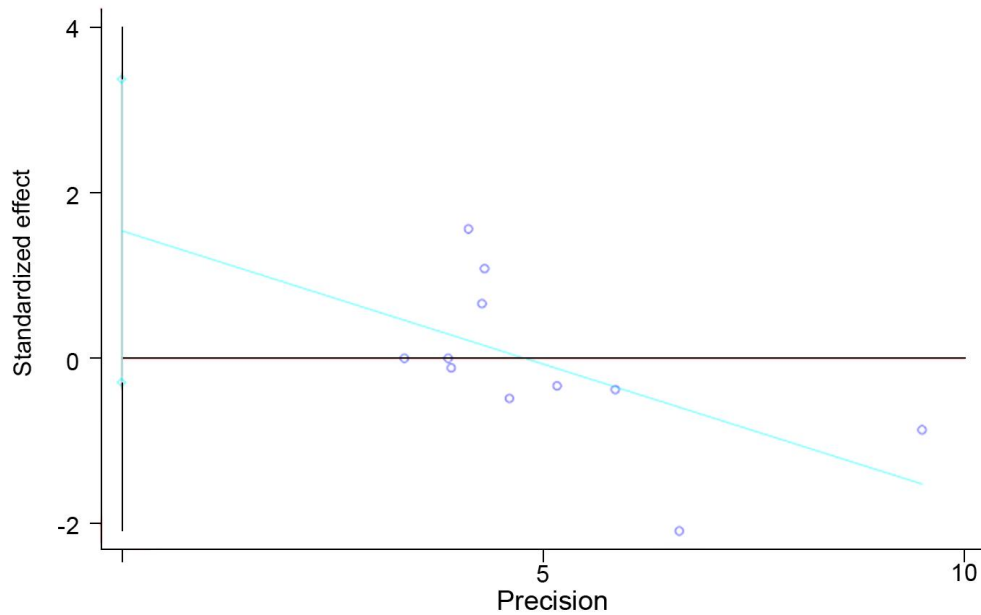

(c) Egger's test

| Std_Eff | Coef.     | Std. Err. | t     | P> t  | [95% Conf. Interval] |          |
|---------|-----------|-----------|-------|-------|----------------------|----------|
| slope   | -.3219122 | .1519904  | -2.12 | 0.063 | -.6657384            | .021914  |
| bias    | 1.538604  | .8084191  | 1.90  | 0.089 | -.290167             | 3.367375 |

**Figure 3.** Success rates of MCAO model animal between the MCAO-KM and MCAO-LG. (a) Forest plot before sensitivity analysis, (b) Egger's publication bias plot, and (c) Egger's test results.

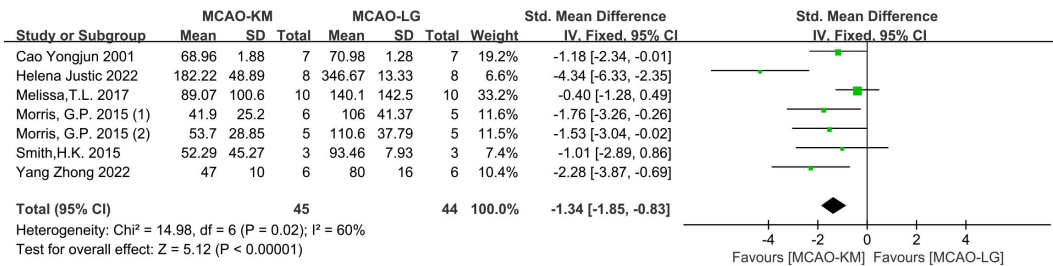

**Figure 4.** Forest plot of cerebral blood flow test between the MCAO-KM and the MCAO-LG.

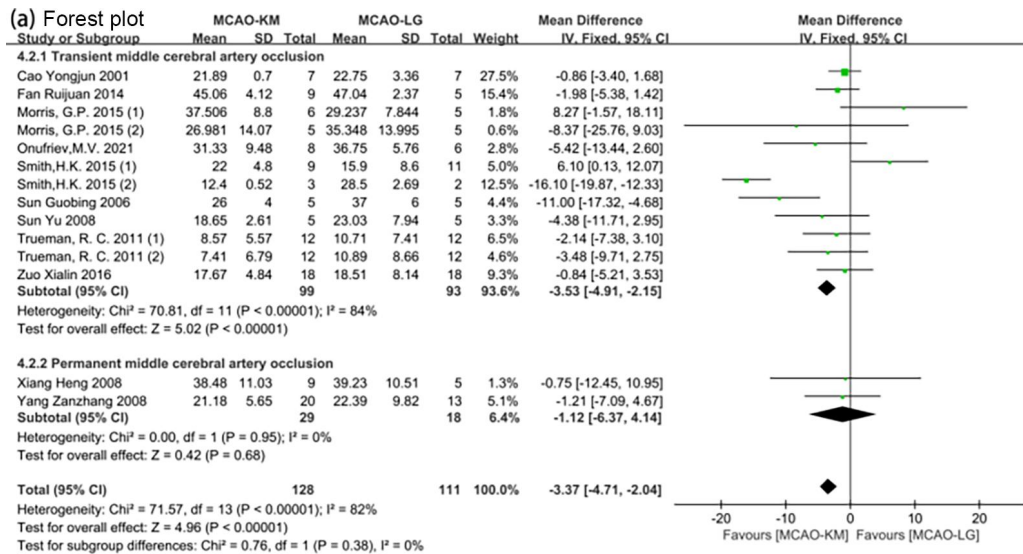

**(b) Egger's publication bias plot**

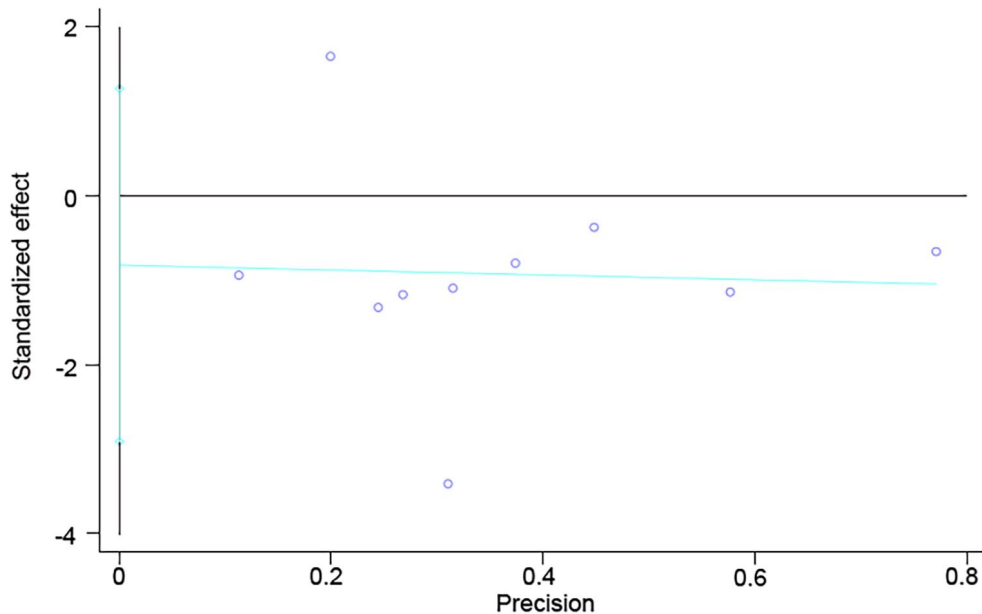

**(c) Egger's test**

| Std_Eff | Coef.      | Std. Err. | t     | P> t  | [95% Conf. Interval] |
|---------|------------|-----------|-------|-------|----------------------|
| slope   | - .2895647 | 2.233063  | -0.13 | 0.900 | -5.439017 4.859888   |
| bias    | - .8230793 | .9058966  | -0.91 | 0.390 | -2.912081 1.265922   |

**Figure 5.** Cerebral infarction rate between the MCAO-KM and the MCAO-LG. Forest plot (a) before sensitivity analysis, Egger's publication bias plot (b), and Egger's test results (c) are shown as follows.

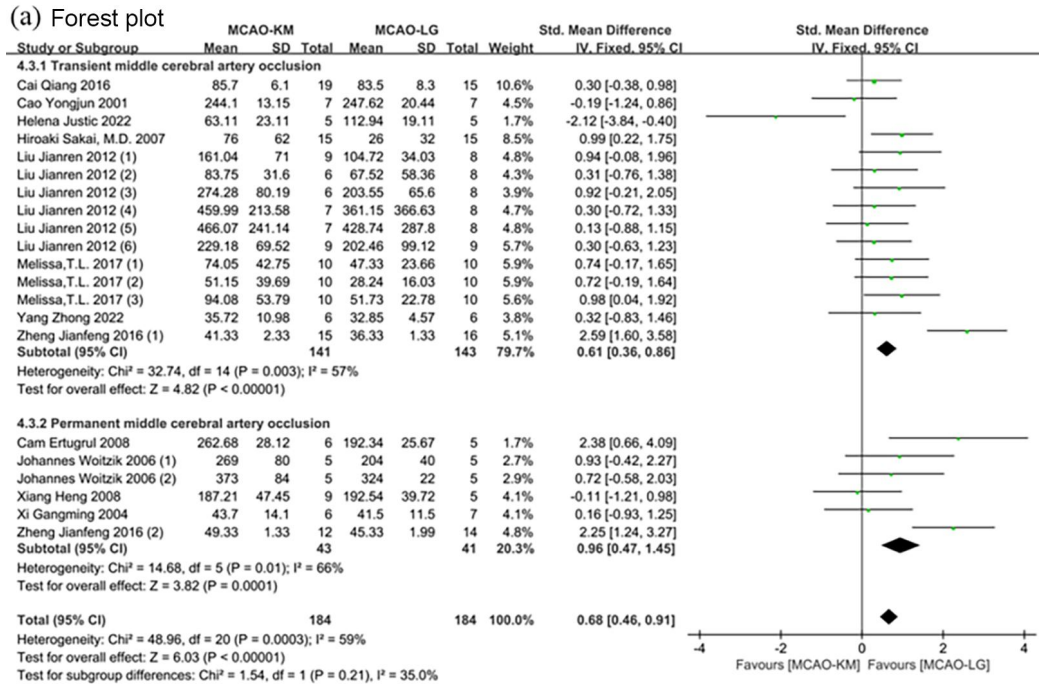

(b) Egger's publication bias plot

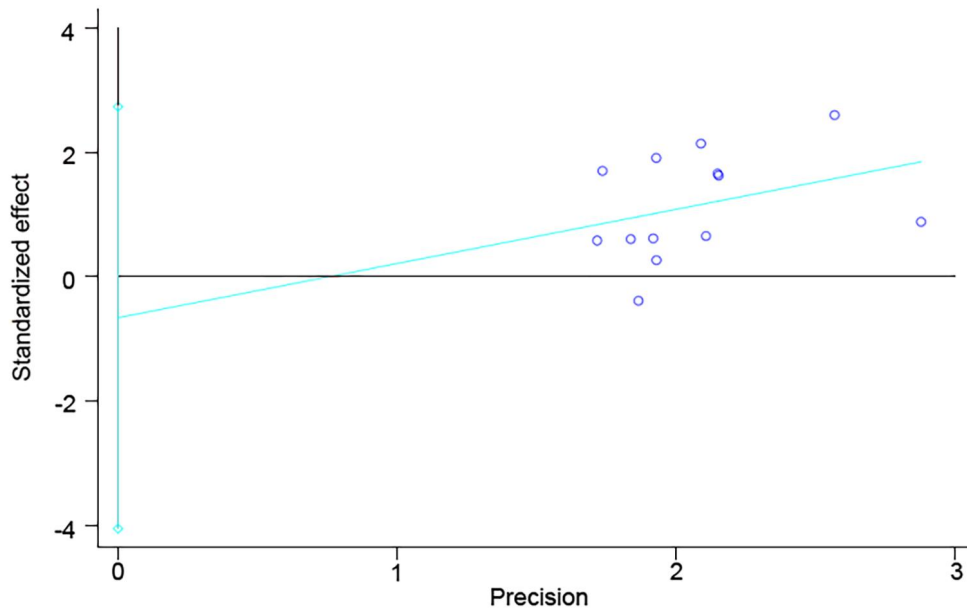

(c) Egger's test

| Std_Eff | Coef.     | Std. Err. | t     | P> t  | [95% Conf. Interval] |
|---------|-----------|-----------|-------|-------|----------------------|
| slope   | .87047    | .7361794  | 1.18  | 0.262 | -.74985 2.49079      |
| bias    | -.6535626 | 1.539623  | -0.42 | 0.679 | -4.04225 2.735125    |

**Figure 6.** Cerebral infarct volume between the MCAO-KM and the MCAO-LG. Forest plot (a) before sensitivity analysis, Egger's publication bias plot (b), and Egger's test results (c) are shown as follows.

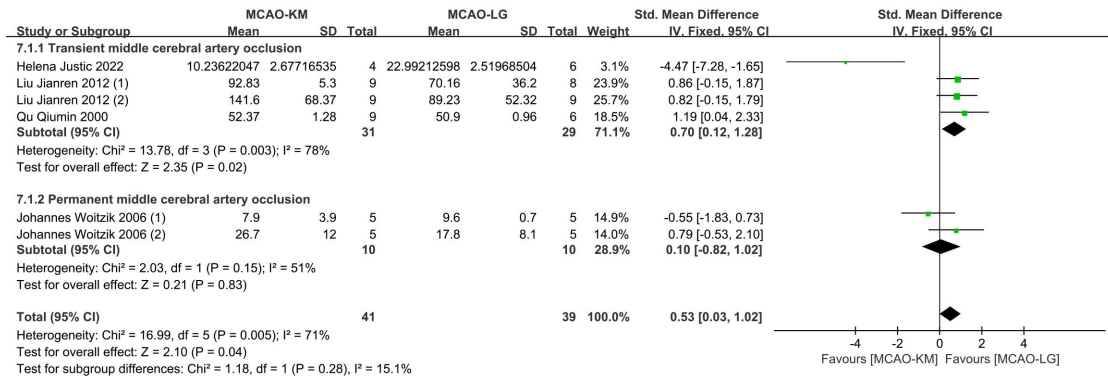

**Figure 7.** Forest plots of brain edema test between the MCAO-KM and the MCAO-LG.

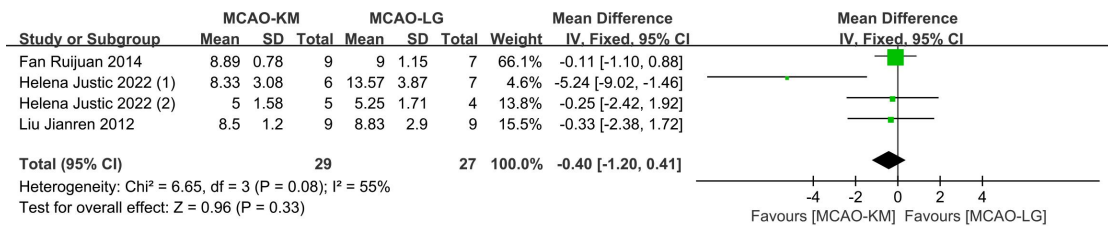

**Figure 8.** Garcia scores between the MCAO-KM and the MCAO-LG.
